# Supplementary material for: Association between Germline Single-Nucleotide Variants in ADME Genes and Major Molecular Response to Imatinib in Chronic Myeloid Leukemia Patients
Source: MDPI journal article supplement (doi:10.3390/jcm11206217), 2022-10-21
Supplement: s1 [file s1]

## SUPPLEMENTARY MATERIAL

**Table S1.** gSNVs significantly associated ( $p < 0.05$ ) with MMR achievement to imatinib first-line treatment in the exploratory cohort ( $n=45$ ) and included in the analysis with the extended cohort.

| RefSNP ID  | Gene           | Gene name                                                  | ADME classification | Consequence        |
|------------|----------------|------------------------------------------------------------|---------------------|--------------------|
| rs1134095  | <i>CYP11B1</i> | Cytochrome P450 family 11 subfamily B member 1             | Phase I enzyme      | 3'UTR variant      |
| rs11770903 | <i>PON3</i>    | Paraoxonase 3                                              | Other               | Upstream variant   |
| rs13959    | <i>ALDH1A1</i> | Aldehyde dehydrogenase 1 family member A1                  | Phase II enzyme     | Synonymous variant |
| rs2501870  | <i>NR1I3</i>   | Nuclear receptor subfamily 1 group I member 3              | Other               | Synonymous variant |
| rs3787537  | <i>SLCO4A1</i> | Solute carrier organic anion transporter family member 4A1 | Transporter         | Intronic variant   |
| rs492338   | <i>ABCG1</i>   | ATP binding cassette subfamily G member 1                  | Transporter         | Intronic variant   |
| rs6783962  | <i>CHST13</i>  | Carbohydrate sulfotransferase 13                           | Phase II enzyme     | Intronic variant   |
| rs7662029  | <i>UGT2B7</i>  | UDP glucuronosyltransferase family 2 member B7             | Phase II enzyme     | Upstream variant   |
| rs1062033  | <i>CYP19A1</i> | Cytochrome P450 family 19 subfamily A member 1             | Phase I enzyme      | Intronic variant   |
| rs10509681 | <i>CYP2C8</i>  | Cytochrome P450 family 2 subfamily C member 8              | Phase I enzyme      | Missense variant   |
| rs1135840  | <i>CYP2D6</i>  | Cytochrome P450 family 2 subfamily D member 6              | Phase I enzyme      | Missense variant   |
| rs11807    | <i>GSTM5</i>   | Glutathione S-transferase mu 5                             | Phase II enzyme     | 3'UTR variant      |
| rs1402467  | <i>SULT1C4</i> | Sulfotransferase family 1C member 4                        | Phase II enzyme     | Missense variant   |
| rs2762934  | <i>CYP24A1</i> | Cytochrome P450 family 24 subfamily A member 1             | Phase I enzyme      | 3'UTR variant      |
| rs4148304  | <i>UGT2A1</i>  | UDP glucuronosyltransferase family 2 member A2             | Phase II enzyme     | Missense variant   |
| rs7003319  | <i>CYP11B1</i> | Cytochrome P450 family 11 subfamily B member 1             | Phase I enzyme      | 3'UTR variant      |
| rs4925     | <i>GSTO1</i>   | Glutathione S-transferase omega 1                          | Phase II enzyme     | Missense variant   |
| rs7668258  | <i>UGT2B7</i>  | UDP glucuronosyltransferase family 2 member B7             | Phase II enzyme     | Upstream variant   |
| rs2274405  | <i>ABCC4</i>   | ATP binding cassette subfamily C member 4                  | Transporter         | Synonymous variant |
| rs1138541  | <i>SLCO5A1</i> | Solute carrier organic transporter family member 5A1       | Transporter         | 3'UTR variant      |
| rs1202283  | <i>ABCB4</i>   | ATP binding cassette subfamily B member 4                  | Transporter         | Synonymous variant |
| rs1530031  | <i>CHST10</i>  | Carbohydrate sulfotransferase 10                           | Phase II enzyme     | 3'UTR variant      |
| rs2274406  | <i>ABCC4</i>   | ATP binding cassette subfamily C member 4                  | Transporter         | Missense variant   |
| rs28360521 | <i>CYP2D6</i>  | Cytochrome P450 family 2 subfamily D member 6              | Phase I enzyme      | Intronic variant   |
| rs4543     | <i>CYP11B2</i> | Cytochrome P450 family 11 subfamily B member 2             | Phase I enzyme      | Synonymous variant |
| rs4934027  | <i>MAT1A</i>   | Methionine adenosyltransferase 1A                          | Other               | Intronic variant   |
| rs700519   | <i>CYP19A1</i> | Cytochrome P450 family 19 subfamily A member 1             | Phase I enzyme      | Missense variant   |
| rs8050894  | <i>VKORC1</i>  | Vitamin K epoxide reductase complex subunit 1              | Other               | Intronic variant   |
| rs1065852  | <i>CYP2D6</i>  | Cytochrome P450 family 2 subfamily D member 6              | Phase I enzyme      | Missense variant   |
| rs11568591 | <i>ABCC3</i>   | ATP binding cassette subfamily C member 3                  | Transporter         | Missense variant   |
| rs1229984  | <i>ADH1B</i>   | Alcohol dehydrogenase 1B (class I), beta polypeptide       | Phase II enzyme     | Missense variant   |
| rs1604741  | <i>SULT1B1</i> | Sulfotransferase family 1B member 1                        | Phase II enzyme     | Intronic variant   |
| rs2276299  | <i>SLC22A8</i> | Solute carrier family 22 member 8                          | Transporter         | Synonymous variant |
| rs2884737  | <i>VKORC1</i>  | Vitamin K epoxide reductase complex subunit 1              | Other               | Intronic variant   |
| rs495714   | <i>ABCB11</i>  | ATP binding cassette subfamily B member 11                 | Transporter         | Intronic variant   |
| rs2242046  | <i>SLC28A1</i> | Solute carrier family 28 member 1                          | Transporter         | Missense variant   |

|            |                 |                                                      |                 |                    |
|------------|-----------------|------------------------------------------------------|-----------------|--------------------|
| rs1395     | <i>SLC5A6</i>   | Solute carrier family 5 member 6                     | Transporter     | Missense variant   |
| rs743616   | <i>ARSA</i>     | Arylsulfatase A                                      | Other           | Intronic variant   |
| rs11764079 | <i>PON3</i>     | Paraoxonase 3                                        | Other           | Upstream variant   |
| rs742350   | <i>FMO1</i>     | Flavin containing dimethylaniline monooxygenase 1    | Phase II enzyme | Synonymous variant |
| rs8192879  | <i>CYP7A1</i>   | Cytochrome P450 family 7 subfamily A member 1        | Phase I enzyme  | 3'UTR variant      |
| rs3100     | <i>UGT2B15</i>  | UDP glucuronosyltransferase family 2 member B15      | Phase II enzyme | 3'UTR variant      |
| rs2292334  | <i>SLC22A3</i>  | Solute carrier family 22 member 3                    | Transporter     | Synonymous variant |
| rs17685    | <i>POR</i>      | Cytochrome p450 oxidoreductase                       | Other           | 3'UTR variant      |
| rs12960    | <i>SPG7</i>     | SPG7 matrix AAA peptidase subunit, paraplegin        | Other           | Missense variant   |
| rs11572080 | <i>CYP2C8</i>   | Cytochrome P450 family 2 subfamily C member 8        | Phase I enzyme  | Missense variant   |
| rs1080983  | <i>CYP2D6</i>   | Cytochrome P450 family 2 subfamily D member 6        | Phase I enzyme  | Upstream variant   |
| rs628031   | <i>SLC22A1</i>  | Solute carrier family 22 member 1                    | Transporter     | Missense variant   |
| rs496550   | <i>ABCB11</i>   | ATP binding cassette subfamily B member 11           | Transporter     | 3'UTR variant      |
| rs895729   | <i>CHST1</i>    | Carbohydrate sulfotransferase 1                      | Phase II enzyme | Intronic variant   |
| rs4646     | <i>CYP19A1</i>  | Cytochrome P450 family 19 subfamily A member 1       | Phase I enzyme  | 3'UTR variant      |
| rs316019   | <i>SLC22A2</i>  | Solute carrier family 22 member 2                    | Transporter     | Missense variant   |
| rs2297322  | <i>SLC15A1</i>  | Solute carrier family 15 member 1                    | Transporter     | Missense variant   |
| rs1801246  | <i>ATP7B</i>    | ATPase copper transporting beta                      | Transporter     | Synonymous variant |
| rs1296954  | <i>GSTM5</i>    | Glutathione S-transferase mu 5                       | Phase II enzyme | 5'UTR variant      |
| rs11584174 | <i>NR1I3</i>    | Nuclear receptor subfamily 1 group I member 3        | Other           | Synonymous variant |
| rs1080985  | <i>CYP2D6</i>   | Cytochrome P450 family 2 subfamily D member 6        | Phase I enzyme  | Upstream variant   |
| rs13226149 | <i>PON3</i>     | Paraoxonase 3                                        | Other           | Synonymous variant |
| rs9934438  | <i>VKORC1</i>   | Vitamin K epoxide reductase complex subunit 1        | Other           | Intronic variant   |
| rs7438284  | <i>UGT2B7</i>   | UDP glucuronosyltransferase family 2 member B7       | Phase II enzyme | Synonymous variant |
| rs497692   | <i>ABCB11</i>   | ATP binding cassette subfamily B member 11           | Transporter     | Synonymous variant |
| rs4679028  | <i>SLC22A14</i> | Solute carrier family 22 member 14                   | Transporter     | Intronic variant   |
| rs324420   | <i>FAAH</i>     | Fatty acid amide hydrolase                           | Other           | Missense variant   |
| rs2359612  | <i>VKORC1</i>   | Vitamin K epoxide reductase complex subunit 1        | Other           | Intronic variant   |
| rs212090   | <i>ABCC1</i>    | ATP binding cassette subfamily C member 1            | Transporter     | 3'UTR variant      |
| rs11731028 | <i>SULT1B1</i>  | Sulfotransferase family 1B member 1                  | Phase II enzyme | Intronic variant   |
| rs1109407  | <i>SLCO2B1</i>  | Solute carrier organic transporter family member 2B1 | Transporter     | Synonymous variant |
| rs2242416  | <i>SLC22A7</i>  | Solute carrier family 22 member 7                    | Transporter     | Downstream variant |
| rs7439366  | <i>UGT2B7</i>   | UDP glucuronosyltransferase family 2 member B7       | Phase II enzyme | Missense variant   |
| rs5303     | <i>CYP11B1</i>  | Cytochrome P450 family 11 subfamily B member 1       | Phase I enzyme  | 3'UTR variant      |
| rs4683739  | <i>CHST2</i>    | Carbohydrate sulfotransferase 2                      | Phase II enzyme | Upstream variant   |
| rs3775770  | <i>SULT1E1</i>  | Sulfotransferase family 1E member 1                  | Phase II enzyme | Intronic variant   |
| rs2479390  | <i>GSTM5</i>    | Glutathione S-transferase mu 5                       | Phase II enzyme | Intronic variant   |
| rs1126692  | <i>FMO1</i>     | Flavin containing dimethylaniline monooxygenase 1    | Phase II enzyme | Synonymous variant |
| rs750398   | <i>CHST1</i>    | Carbohydrate sulfotransferase 1                      | Phase II enzyme | Synonymous variant |
| rs4736312  | <i>CYP11B1</i>  | Cytochrome P450 family 11 subfamily B member 1       | Phase I enzyme  | 3'UTR variant      |

**Table S2.** Cumulative incidences (median [95%CI]) of MMR achievement for each of the genotypes of the gSNVs statistically significant obtained in the analyses of the extended cohort ( $n=137$ ).  $P$ -value is indicated for each gSNV and those statistically significant are in bold.

| Gene           | RefSNP ID             | Genotype          | Cumulative incidence (median [95%CI])                    | $p$          |
|----------------|-----------------------|-------------------|----------------------------------------------------------|--------------|
| <i>ABCG1</i>   | rs492338              | T/T<br>C/T<br>C/C | 58% [42% - 71%]<br>73% [62% - 81%]<br>83% [65% - 93%]    | <b>0.046</b> |
| <i>ABCB11</i>  | rs496550              | G/G<br>A/G<br>A/A | 62% [47% - 74%]<br>73% [61% - 81%]<br>86% [73% - 94%]    | 0.338        |
| <i>ABCB11</i>  | rs497692              | G/G<br>A/G<br>A/A | 62% [47% - 74%]<br>73% [61% - 81%]<br>86% [86% - 86%]    | 0.362        |
| <i>ABCB11</i>  | rs495714              | G/G<br>A/G<br>A/A | 81% [67% - 89%]<br>74% [63% - 83%]<br>62% [47% - 74%]    | 0.344        |
| <i>CYP2D6</i>  | rs1135840             | C/C<br>C/G<br>G/G | 77% [65% - 85%]<br>75% [61% - 85%]<br>52% [34% - 67%]    | 0.148        |
| <i>CYP11B1</i> | rs7003319             | C/C<br>A/C<br>A/A | 81% [69% - 88%]<br>66% [54% - 76%]<br>60% [42% - 74%]    | 0.179        |
| <i>CYP11B1</i> | rs7003319 (dominant)  | C/C<br>A/C- A/A   | 81% [69% - 88%]<br>64% [54% - 73%]                       | 0.069        |
| <i>MAT1A</i>   | rs4934027             | C/C<br>C/T<br>T/T | 62% [52% - 70%]<br>86% [72% - 93%]<br>100% [100% - 100%] | <b>0.011</b> |
| <i>MAT1A</i>   | rs4934027 (dominant)  | C/C<br>C/T-T/T    | 62% [52% - 70%]<br>88% [75% - 94%]                       | <b>0.011</b> |
| <i>SLC22A1</i> | rs628031              | G/G<br>A/G<br>A/A | 76% [64% - 85%]<br>73% [61% - 82%]<br>36% [11% - 63%]    | 0.119        |
| <i>SLC22A1</i> | rs628031 (recessive)  | G/G-A/G<br>A/A    | 75% [67% - 81%]<br>36% [11% - 63%]                       | <b>0.043</b> |
| <i>CYP2D6</i>  | rs1065852             | C/C<br>C/T<br>T/T | 69% [59% - 77%]<br>68% [52% - 80%]<br>100% [100% - 100%] | <b>0.047</b> |
| <i>CYP2D6</i>  | rs1065852 (recessive) | C/C-C/T<br>T/T    | 69% [60% - 76%]<br>100% [100% - 100%]                    | <b>0.014</b> |
| <i>UGT2A1</i>  | rs4148304             | G/G<br>A/G<br>A/A | 72% [62% - 79%]<br>80% [69% - 88%]<br>20% [20% - 20%]    | 0.209        |
| <i>UGT2A1</i>  | rs4148304 (recessive) | G/G-A/G<br>A/A    | 74% [66% - 80%]<br>20% [20% - 20%]                       | 0.124        |
